# Supplementary material
Source: publisher site journal article supplement (https://www.dovepress.com/article/290153)
Supplement: Supplementary file 1 [file get_supplementary_file.php]

**Appendix 1: Wavelet transform coherence**

| 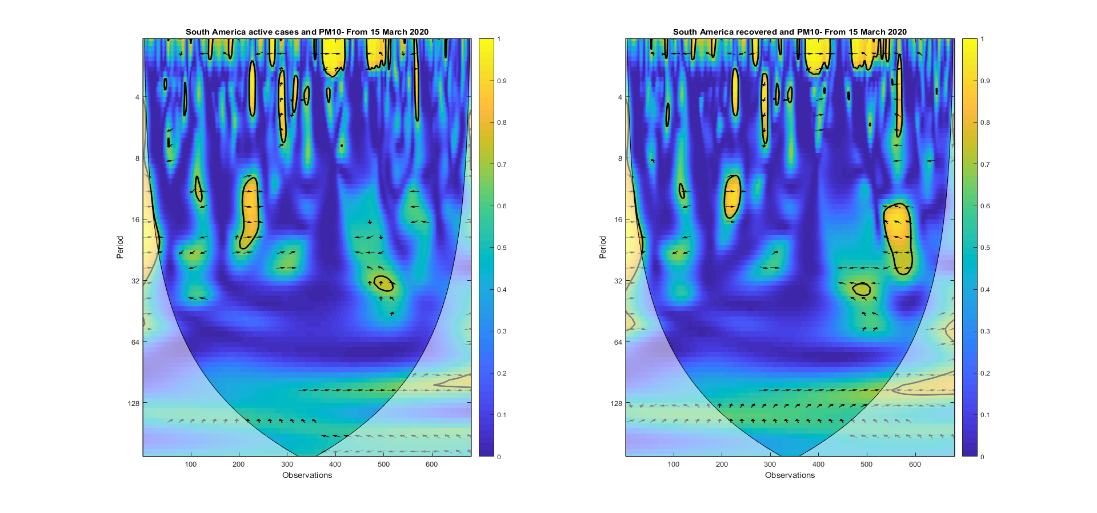 | 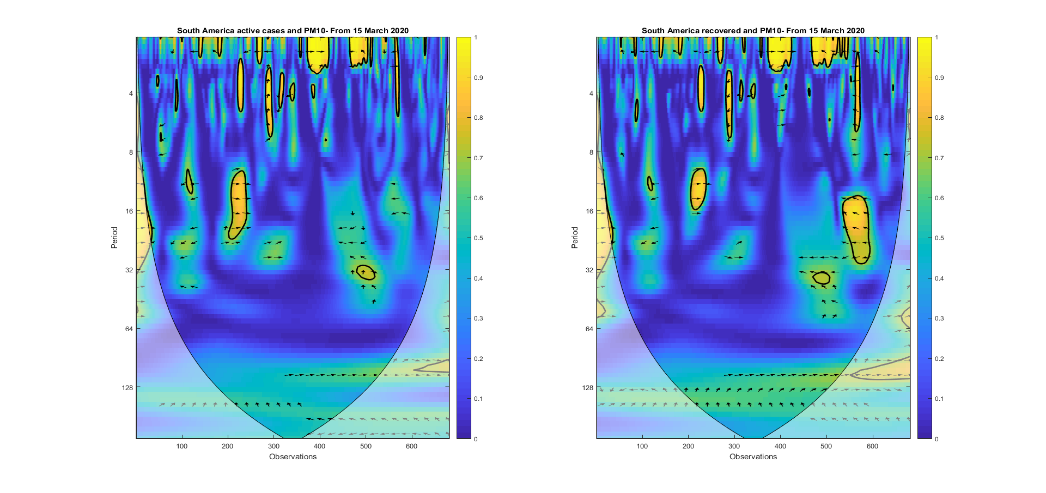 |
| --- | --- |
| Figure 1a. Active cases and PM10 | Figure 1b. Recoveries and PM10 |
| 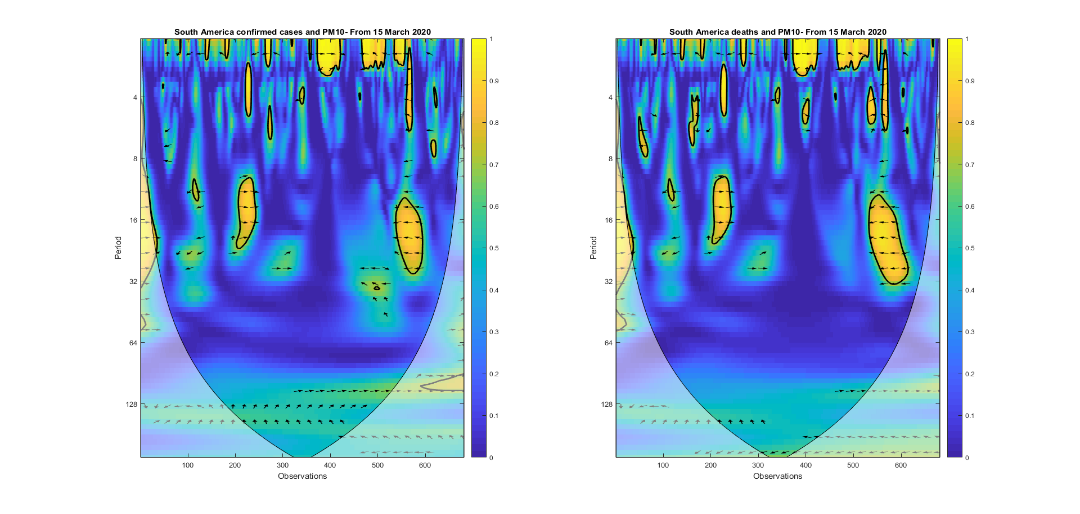 | 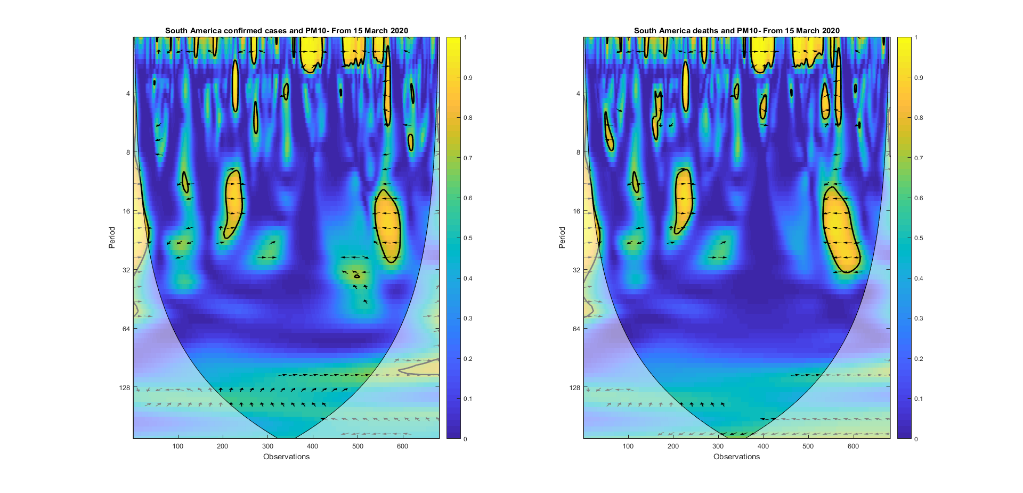 |
| Figure 1c. Confirmed cases and PM10 | Figure 1d. Deaths and PM10 |

| 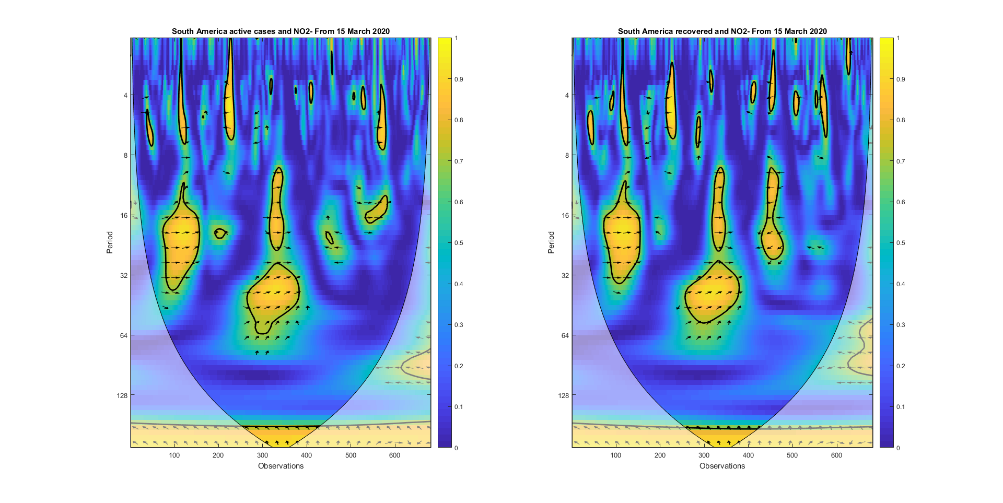 | 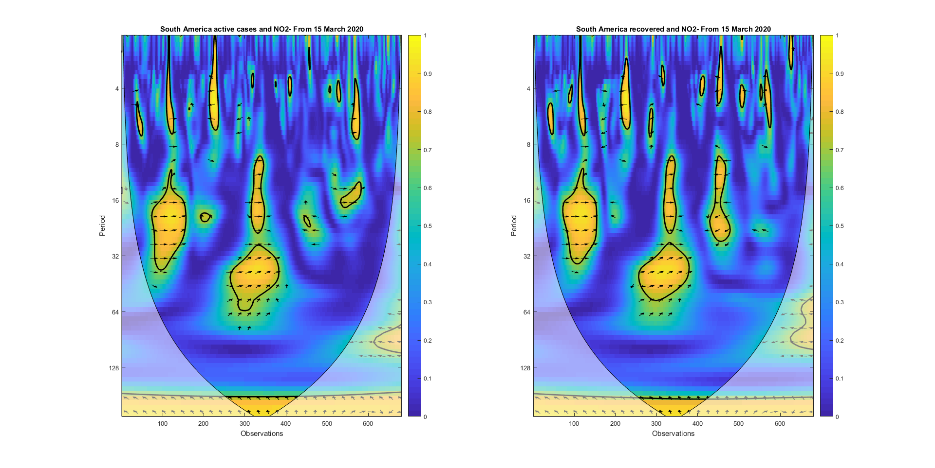 |
| --- | --- |
| Figure 2a. Active cases and NO2 | Figure 2b. Recoveries and NO2 |
| 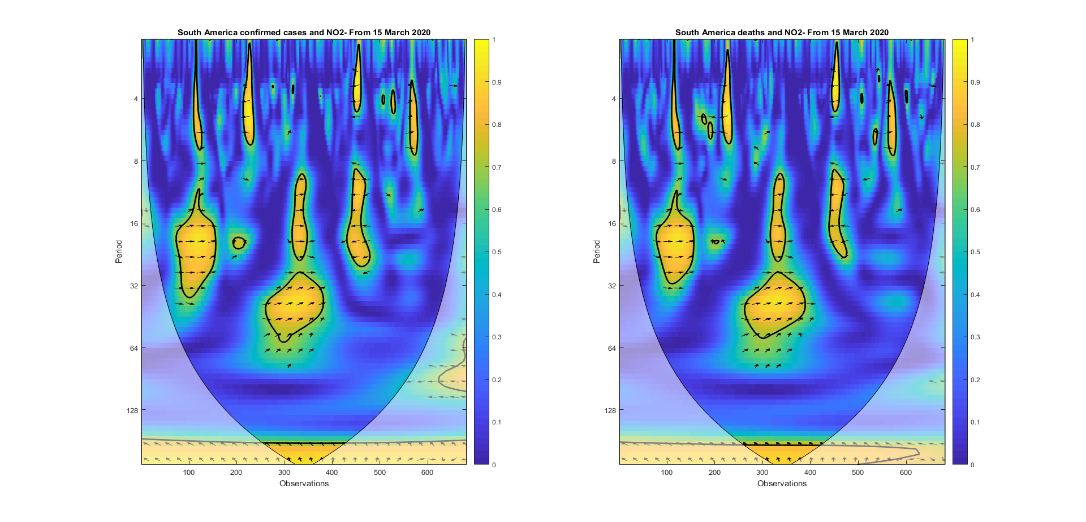 | 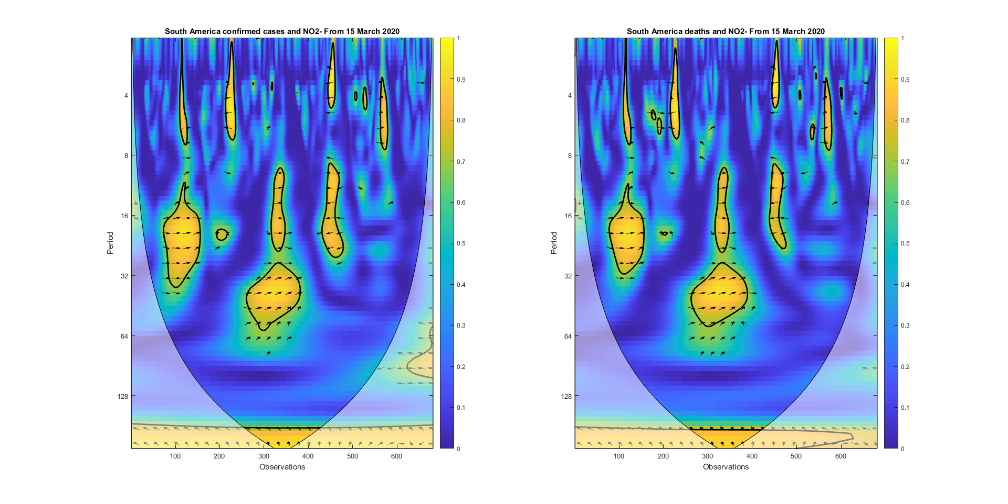 |
| Figure 2c. Confirmed cases and NO2 | Figure 2d. Deaths and NO2 |

| 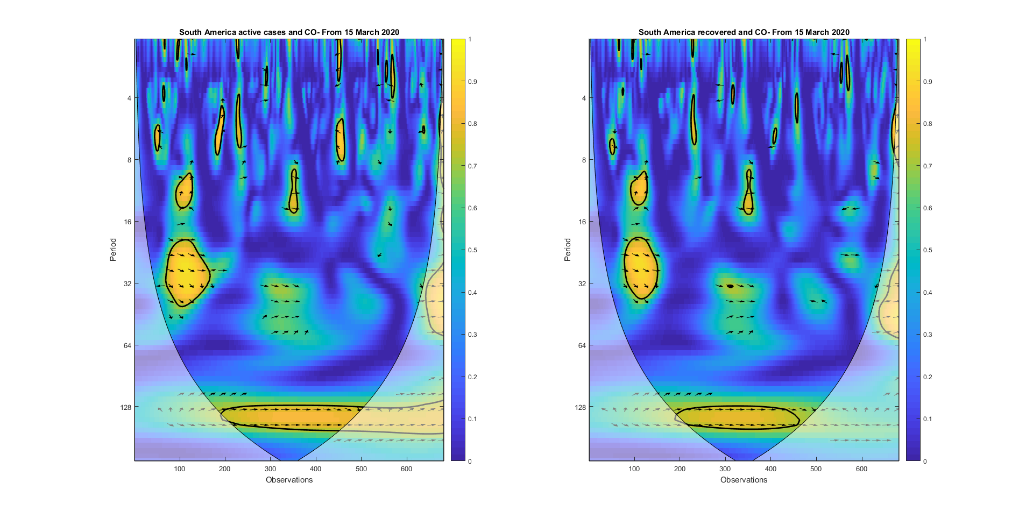 | 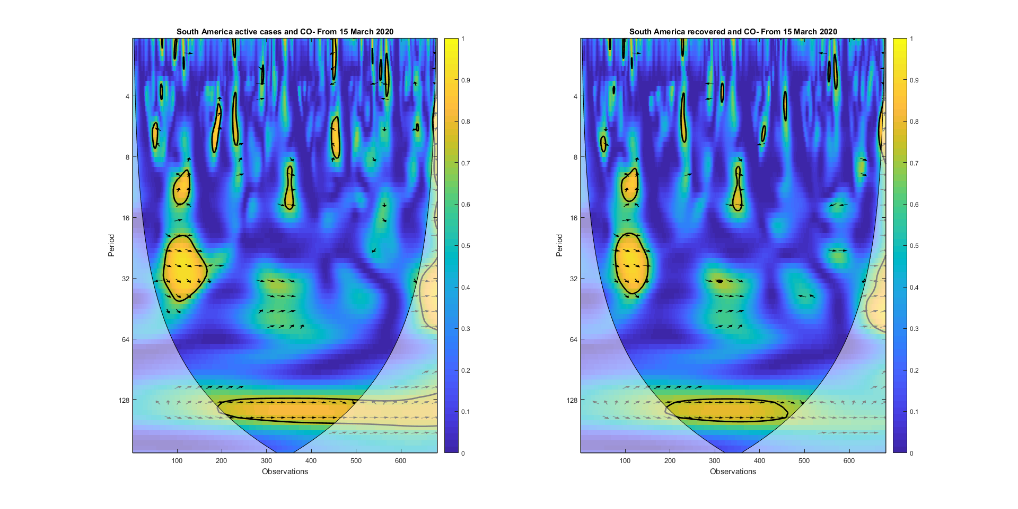 |
| --- | --- |
| Figure 3a. Active cases and CO | Figure 3b. Recoveries and CO |
| 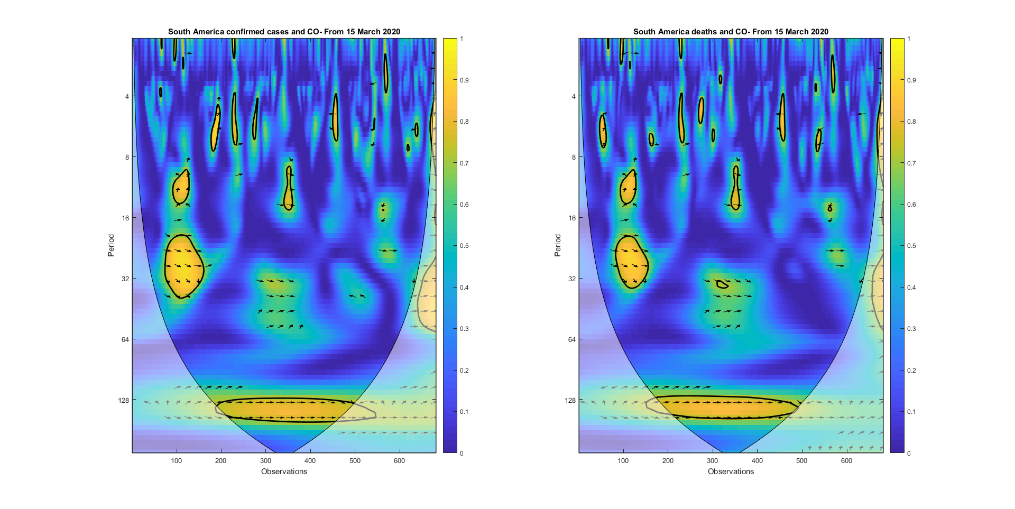 | 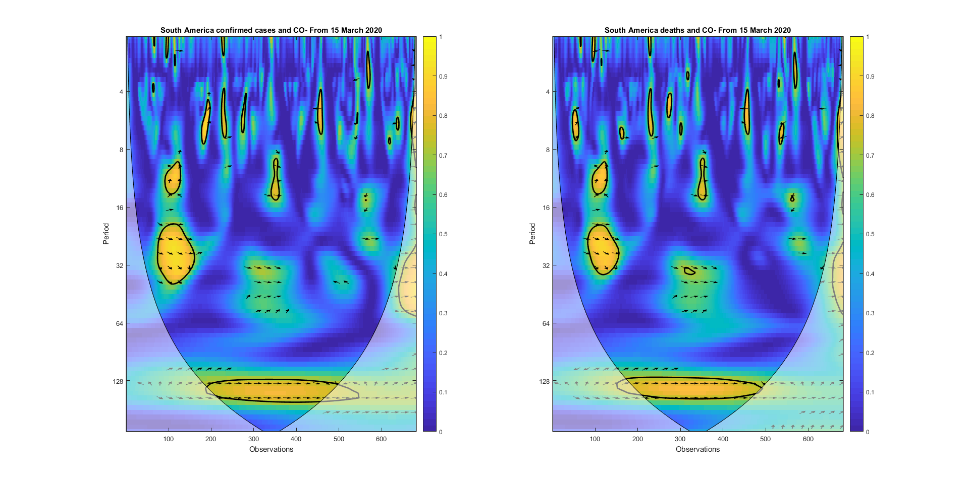 |
| Figure 3c. Confirmed cases and CO | Figure 3d. Deaths and CO |

| 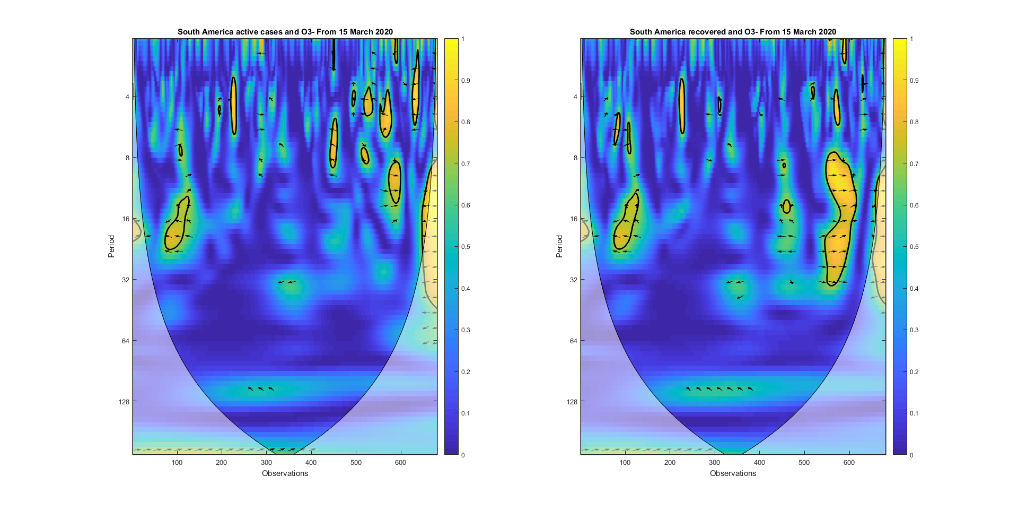 | 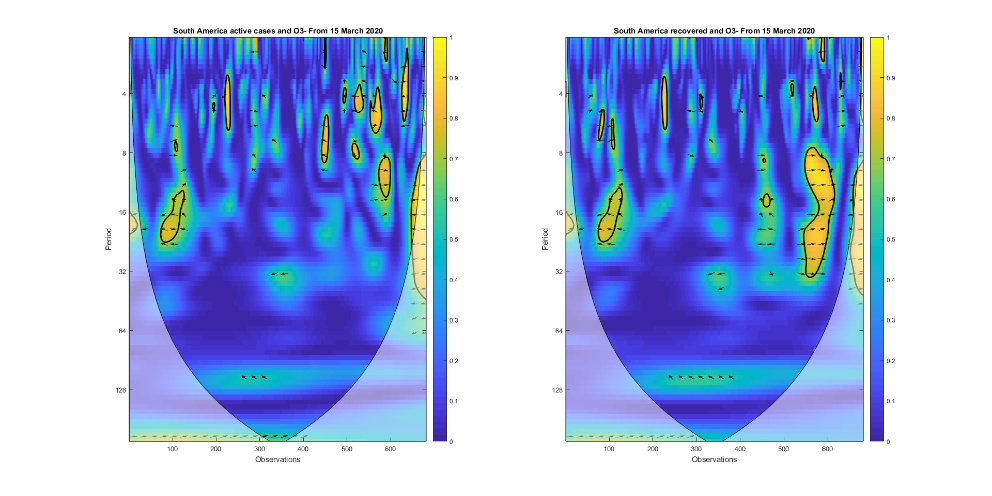 |
| --- | --- |
| Figure 4a. Active cases and O3 | Figure 4b. Recoveries and O3 |
| 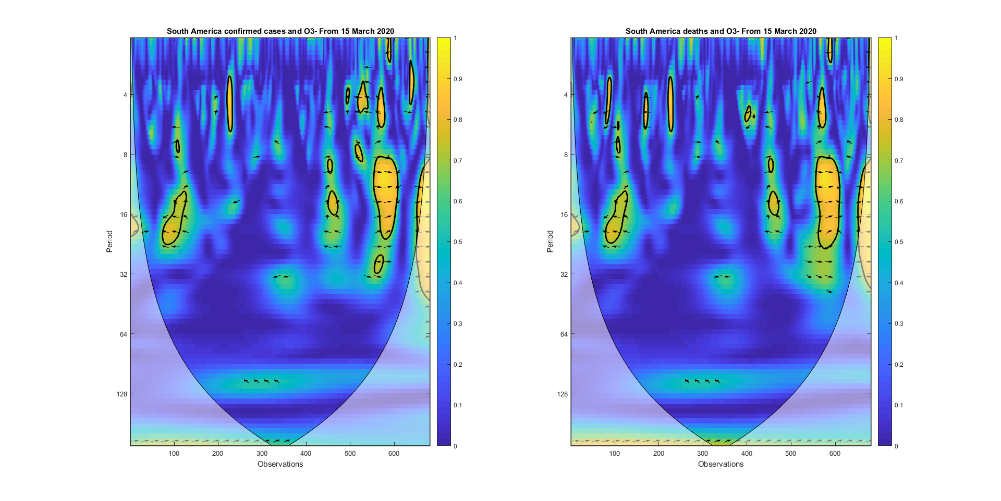 | 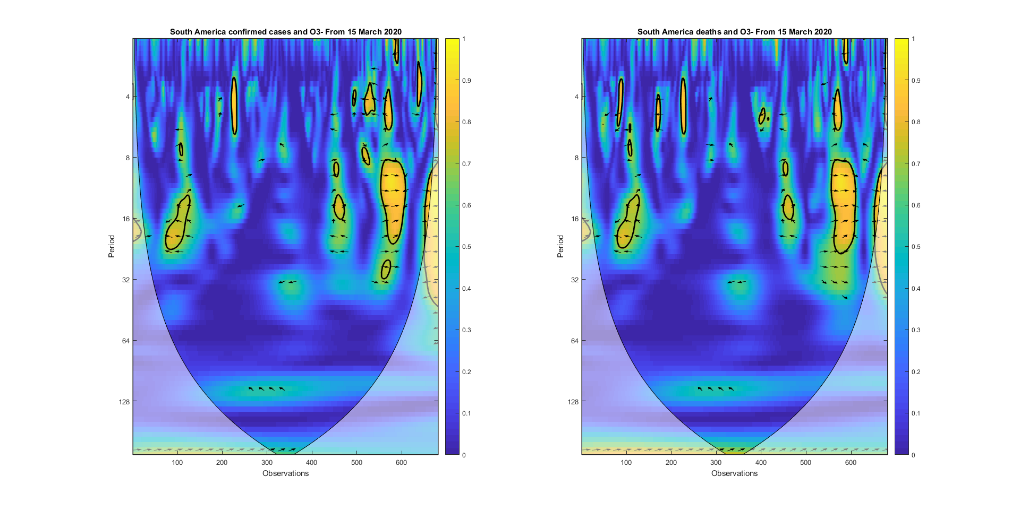 |
| Figure 4c. Confirmed cases and O3 | Figure 4d. Deaths and O3 |
